# Supplementary material for: Mieap suppresses murine intestinal tumor via its mitochondrial quality control
Source: PubMed Central journal article supplement (PMC4516962; doi:10.1038/srep12472), 2015-07-28
Supplement: srep12472-s1.pdf [file srep12472-s1.pdf]

## **Supplementary Information**

### **Mieap suppresses murine intestinal tumor via its mitochondrial quality control**

Masayuki Tsuneki<sup>1</sup>, Yasuyuki Nakamura<sup>1</sup>, Takao Kinjo<sup>2</sup>, Ruri Nakanishi<sup>1</sup>, and Hirofumi Arakawa<sup>1</sup>

<sup>1</sup>Division of Cancer Biology, National Cancer Center Research Institute, 5-1-1 Tsukiji, Chuo-ku, Tokyo 104-0045, Japan

<sup>2</sup>Division of Morphological Pathology, Department of Basic Laboratory Sciences, School of Health Sciences, Faculty of Medicine, University of the Ryukyus, 207 Uehara, Nishihara, Okinawa, 903-0215, Japan

**Figure S1. Histopathology of the intestinal mucosal epithelia in the wild-type and *Mieap*<sup>-/-</sup> mice.**

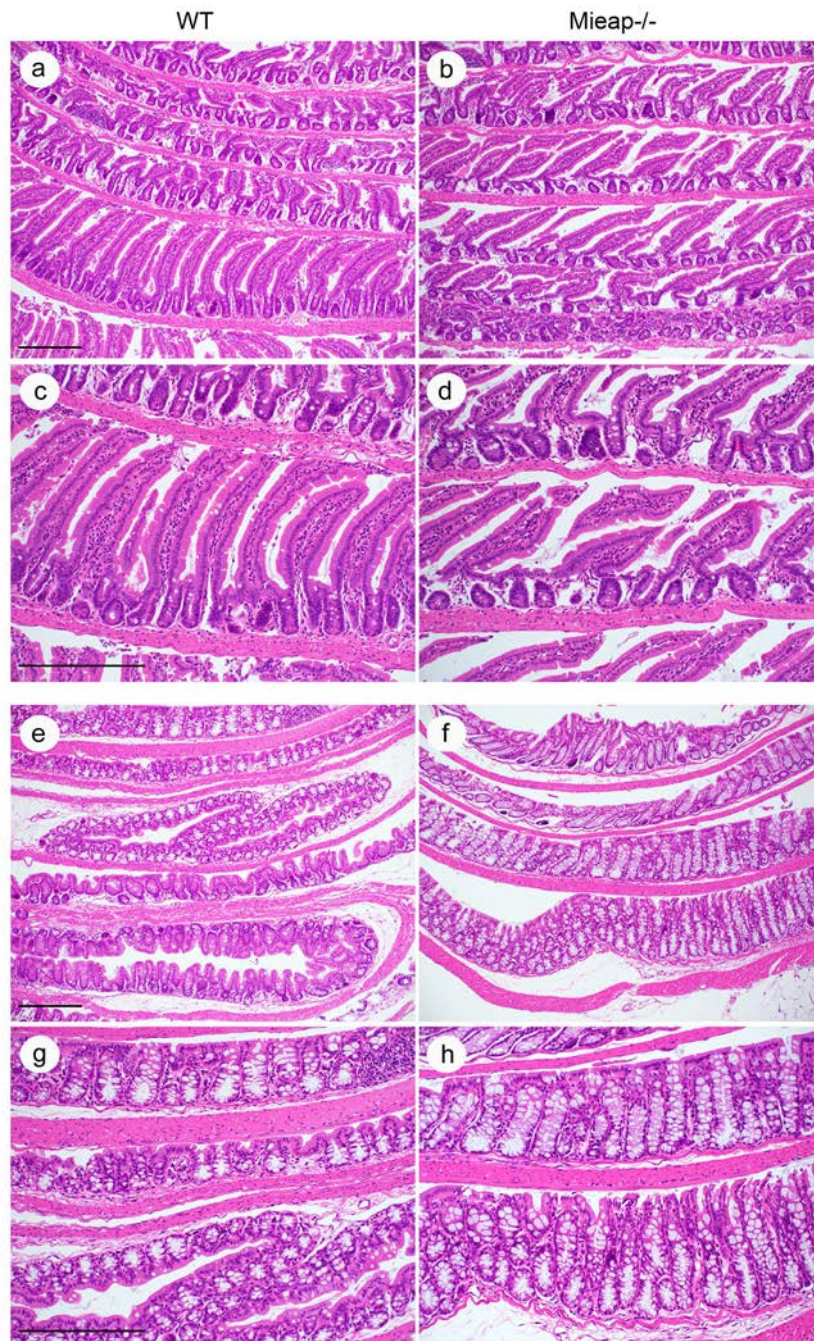

Microscopic images of small intestinal epithelia (a-d) and colonic epithelia (e-h) in the wild-type (WT) (a, c, e, g) and *Mieap*<sup>-/-</sup> (b, d, f, h) mice. Scale bars, 200  $\mu$ m. No polyps/tumors could be found, and the histology was nearly normal in the small intestines and colons of the WT and *Mieap*<sup>-/-</sup> mice.

**Figure S2. Histopathology of tumor-free intestinal mucosal epithelia in the  $Apc^{Min/+}$ ,  $Apc^{Min/+}Mieap^{+/-}$ , and  $Apc^{Min/+}Mieap^{-/-}$  mice.**

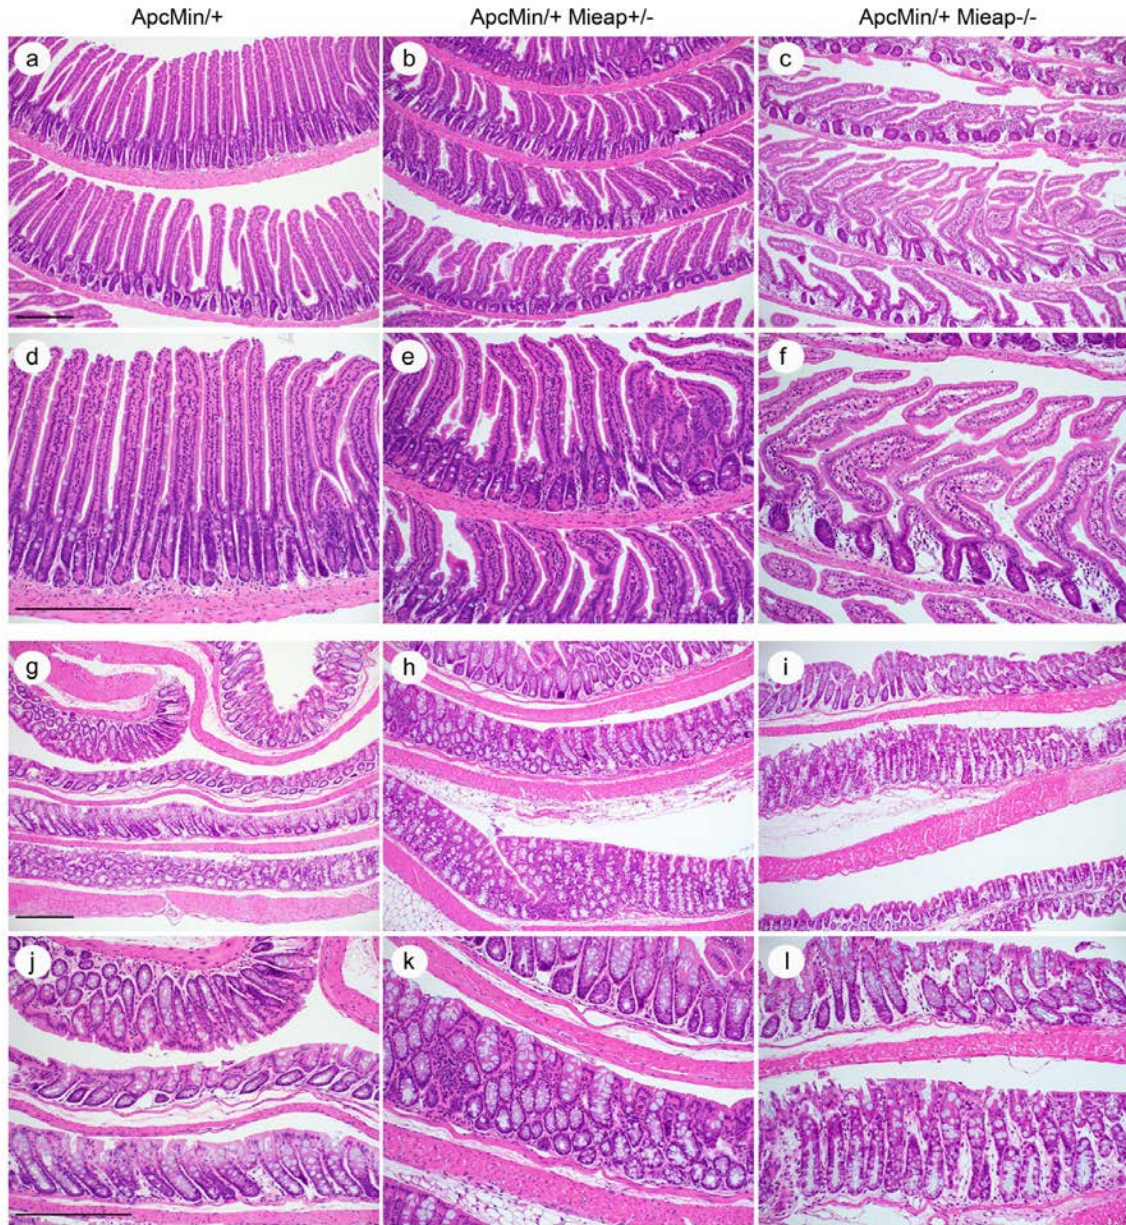

Microscopic images of small intestinal epithelia (a-f) and colonic epithelia (g-l) in  $Apc^{Min/+}$  (a, d, g, j),  $Apc^{Min/+}Mieap^{+/-}$  (b, e, h, k), and  $Apc^{Min/+}Mieap^{-/-}$  (c, f, i, l). Scale bars, 200  $\mu$ m. There were nearly no histopathological differences among the intestinal epithelia of the  $Apc^{Min/+}$ ,  $Apc^{Min/+}Mieap^{+/-}$ , and  $Apc^{Min/+}Mieap^{-/-}$  mice in terms of tumors. However, in the small intestines of the  $Apc^{Min/+}Mieap^{-/-}$  mice, the tumor-free epithelia were slightly atrophic.

**Figure S3. Robust increased Ki67 positive proliferating tumor cells in the high grade adenoma (Category 2) and adenocarcinoma (Category 3) as compared to the low grade adenoma (Category 1).**

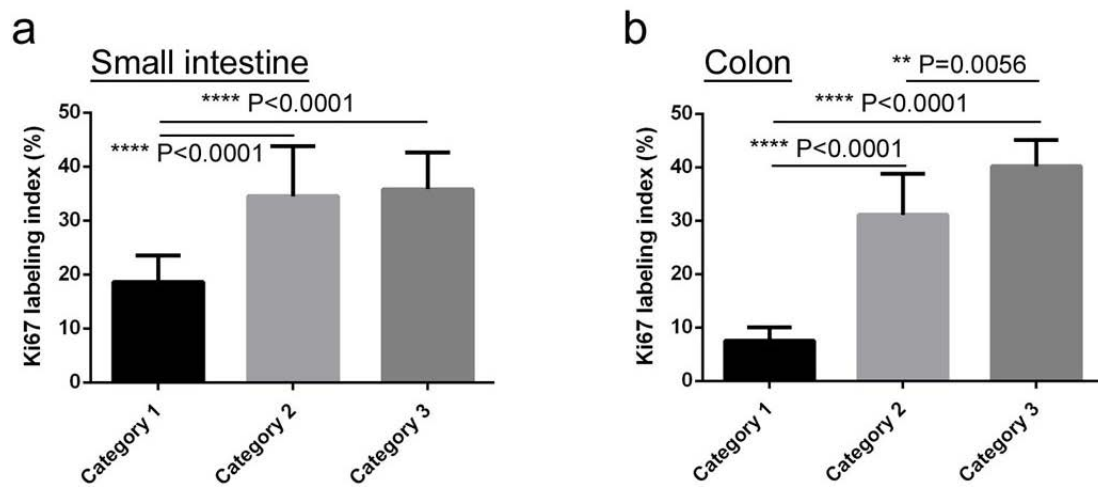

Small intestinal (a) and colonic (b) tumor cell proliferative potentials of the Category 1, 2, and 3 neoplasms were evaluated by Ki67 labeling indices (%). The data represent the mean Ki67-labeling indices  $\pm$  SD (\*\*,  $P < 0.01$ ; \*\*\*\*,  $P < 0.0001$ ).

**Figure S4. Decreased internal mitochondrial density in the small intestinal mucosal epithelium of *Mieap*<sup>-/-</sup> mice.**

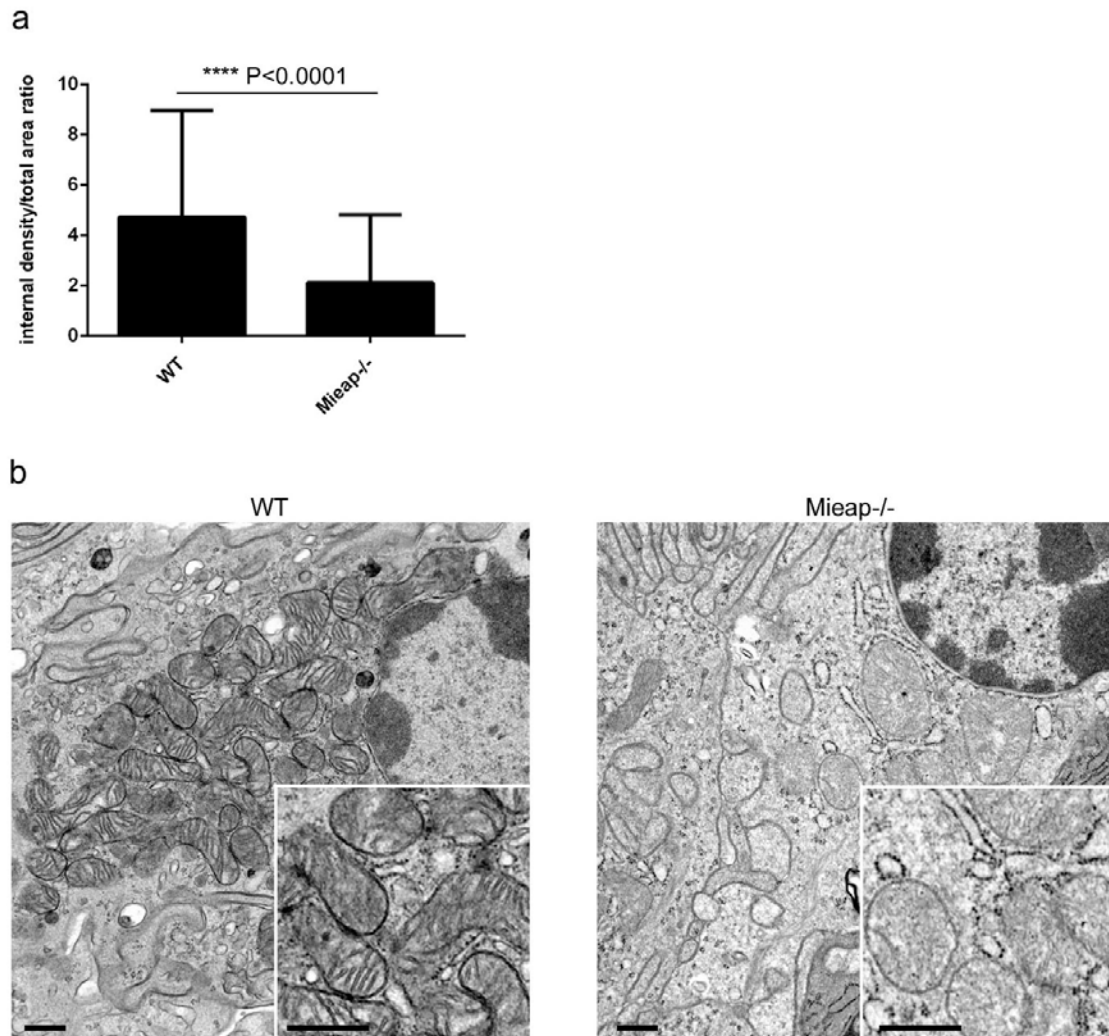

(a) Densitometric image analysis of the internal mitochondrial density (internal cristae density) was performed in the WT and *Mieap*<sup>-/-</sup> small intestinal mucosal epithelium (n = 100 mitochondria, each). The data represent the mean internal density/total area ratio ± SD (\*\*\*\*,  $P < 0.0001$ ). (b) Representative electron micrographs of mitochondrial architectures in WT (left panel with high power inset) and *Mieap*<sup>-/-</sup> (right panel with high power inset) mucosal epithelial cells. Scale bars, 500 nm.

**Figure S5. 8-OHdG and nitrotyrosine immunolocalization in small intestinal tumors of the  $Apc^{Min/+}Mieap^{+/-}$  mice.**

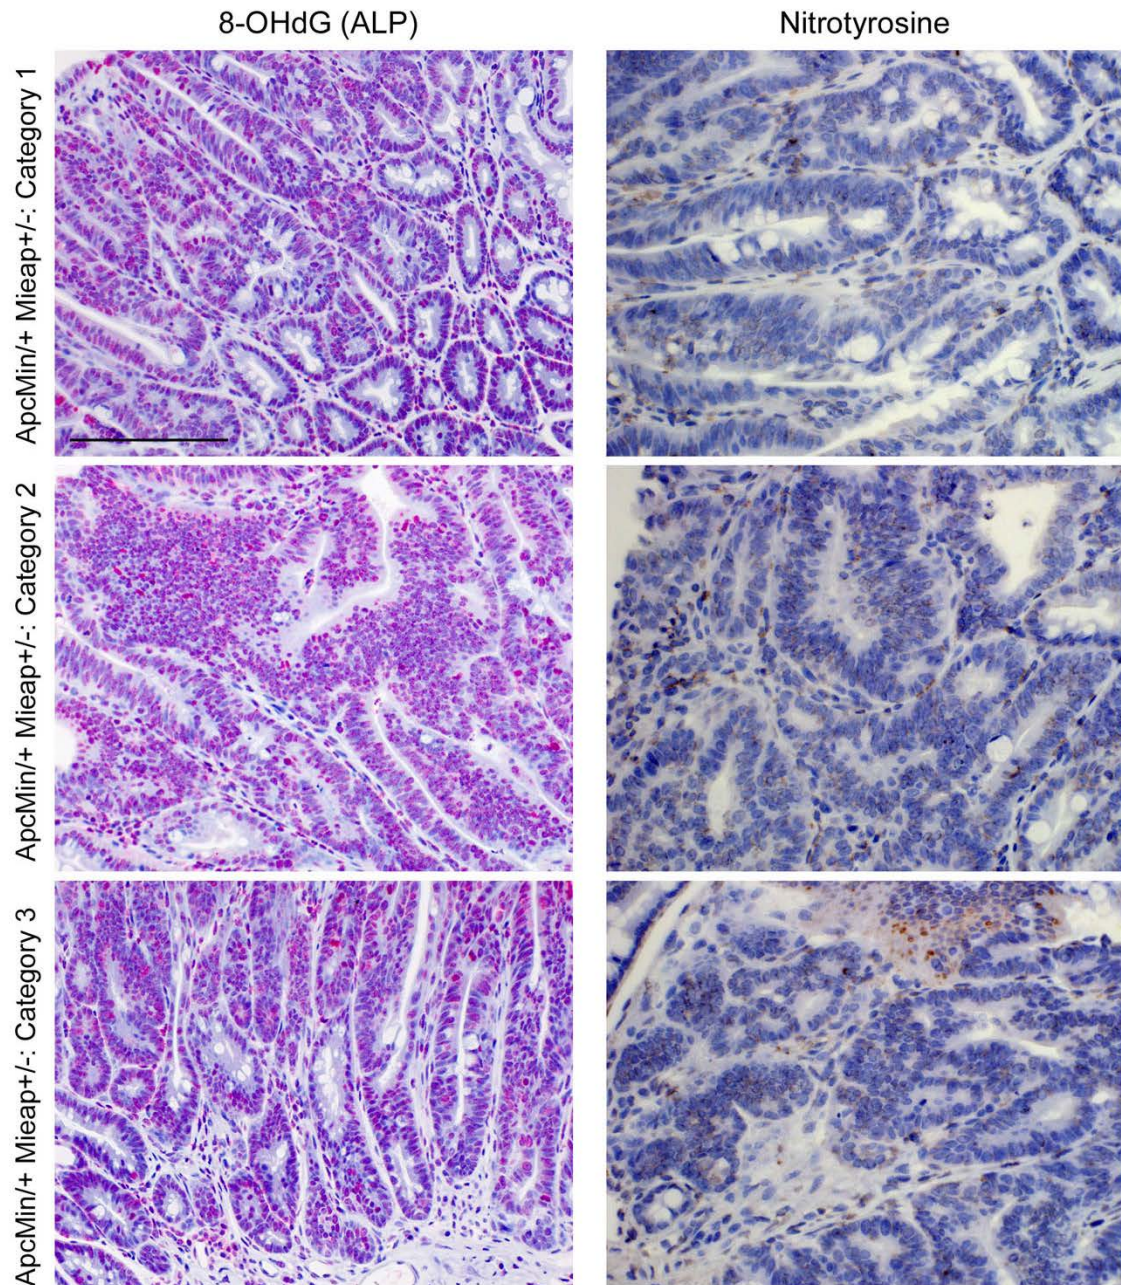

Immuno-alkaline phosphatase (ALP) staining for 8-OHdG (left column) and immuno-peroxidase (DAB) staining for nitrotyrosine (right column), hematoxylin counterstaining. Representative histology of Category 1 (top row), Category 2 (second from top row), and Category 3 (bottom row) in  $Apc^{Min/+}Mieap^{+/-}$  mice. Scale bar, 100  $\mu$  m.
